# Supplementary material for: Eugenol-Containing Essential Oils Loaded onto Chitosan/Polyvinyl Alcohol Blended Films and Their Ability to Eradicate Staphylococcus aureus or Pseudomonas aeruginosa from Infected Microenvironments
Source: MDPI journal article supplement (doi:10.3390/pharmaceutics13020195), 2021-02-02
Supplement: s1 [file s1]

Supplementary

## Eugenol-containing essential oils loaded onto chi-tosan/polyvinyl alcohol blended films and their ability to eradicate *Staphylococcus aureus* or *Pseudomonas aeruginosa* from infected microenvironments

Joana C. Antunes, Tânia D. Tavares, Marta A. Teixeira, Marta O. Teixeira, Natália C. Homem, M. Teresa P. Amorim and Helena P. Felgueiras

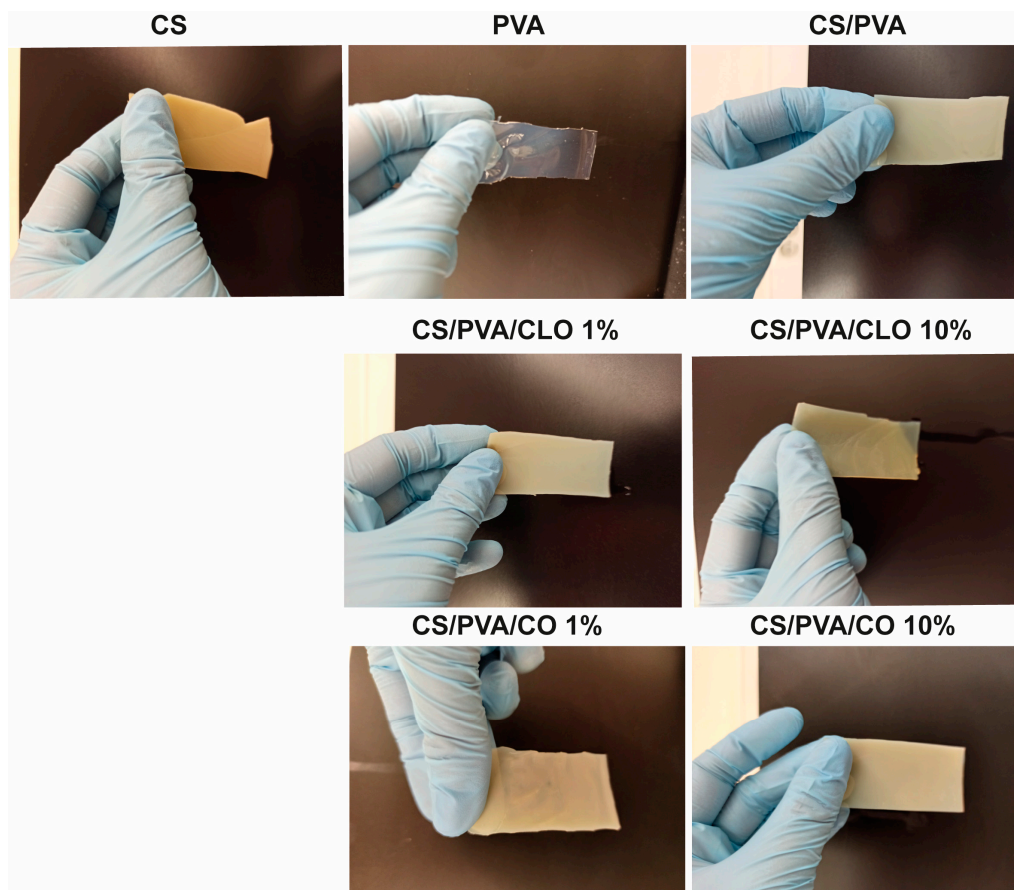

**Figure S1.** Macroscopic view of CS/PVA-based blended films. Representative photographs of sliced rectangles (from the periphery to its centre) with  $6 \times 3 \text{ cm}^2$ , used for UV-visible spectroscopy measurements.

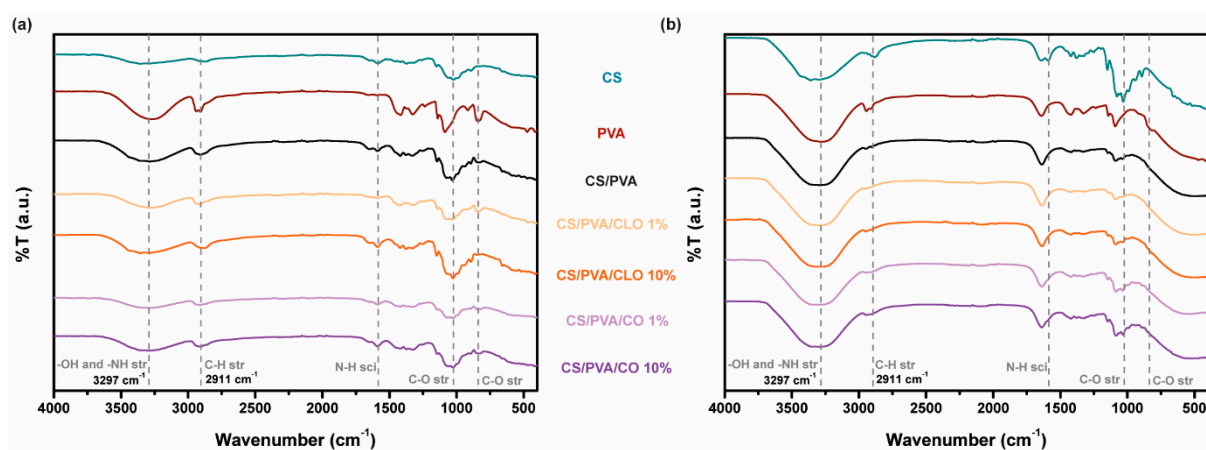

**Figure S2.** FTIR-ATR spectra of the EO-unloaded and loaded CS/PVA-based blended films ( $4000\text{--}400\text{ cm}^{-1}$ ), in a (a) hydrated (as-prepared), and (b) dried state (after drying for 7 days at  $37^\circ\text{C}$ ).
